# Supplementary material for: Synergistic TME-manipulation effects of a molybdenum-based polyoxometalate enhance the PTT effects on cancer cells
Source: Royal Society of Chemistry journal article supplement (doi:10.1039/d2nj00278g), 2022-01-01
Supplement: d2nj00278g1.pdf [file d2nj00278g1.pdf]

(ESI)

## Synergistic TME-manipulation Effects of a Molybdenum-based Polyoxometalate Enhanced the PTT Effects on Cancer Cells

Gang Chen,<sup>ab</sup> Yu Wang,<sup>ab</sup> Xueping Kong,<sup>a</sup> Hongwei Li,<sup>ab</sup> Bao Li,<sup>a</sup> Xianghui Yu,<sup>c</sup> Lixin Wu,<sup>a</sup> and Yuqing Wu,<sup>\*ab</sup>

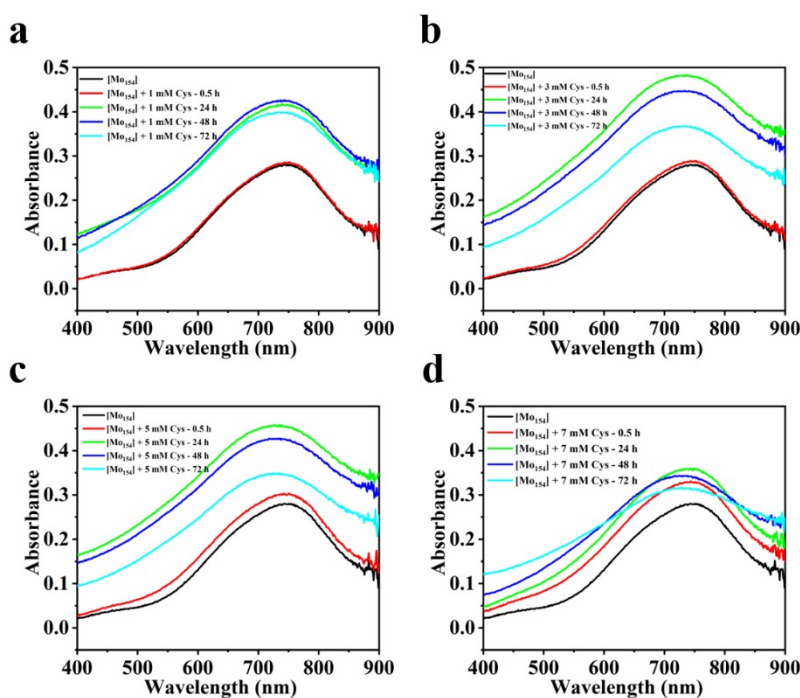

**Fig. S1** Time-dependent UV-vis absorption spectra of  $[Mo_{154}]$  in the presence of different amounts of Cys between 1-7 mM.

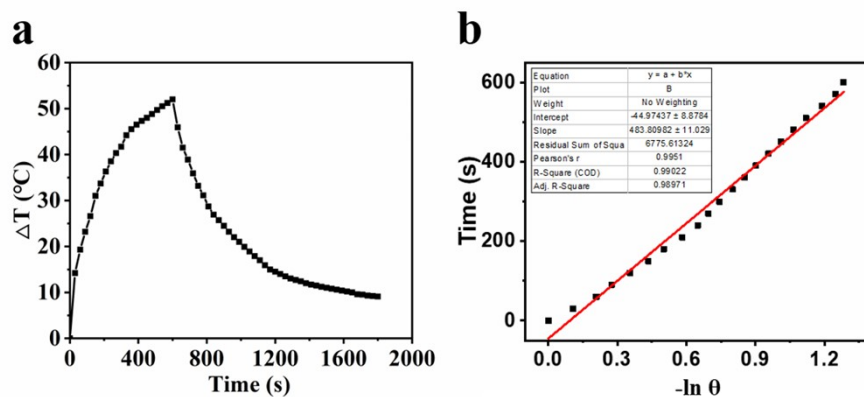

**Fig. S2** (a) The temporal temperature variation of 5  $\mu\text{M}$  [ $\text{Mo}_{154}$ ] and 3 mM cysteine after 24 h incubated. The volume of solution is 1 mL. The solution is irradiated for 10 min using a laser of 808 nm ( $1.4 \text{ W}/\text{cm}^2$ ), and then cooled to the room temperature at the ambient environment. (b) Time constant for heat transfer from the system is calculated to be  $\tau_s = 483.80982 \text{ s}$  by applying the linear time data from the cooling period *versus* negative natural logarithm of driving force temperature, which is obtained from Fig. S2a.

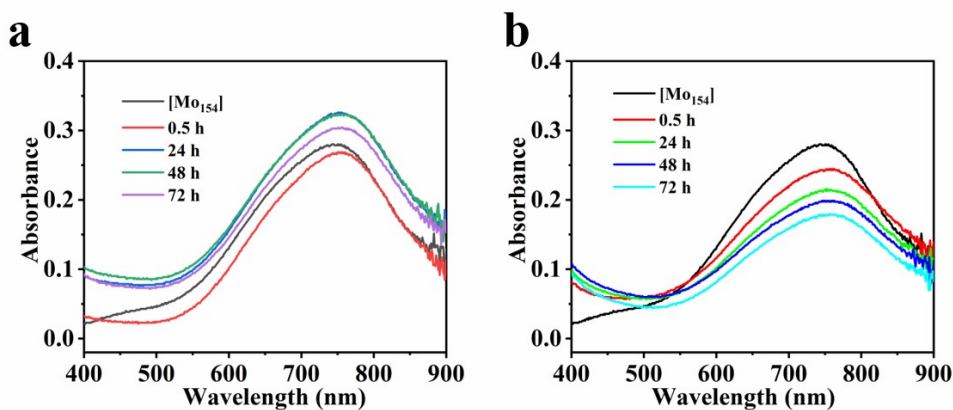

**Fig. S3** UV-vis absorption spectra of 5  $\mu\text{M}$   $[\text{Mo}_{154}]$  in the presence of 3 mM Cys after incubation for different times (at 4  $^{\circ}\text{C}$ ), at (a) pH 5.0 and (b) 6.0, respectively.

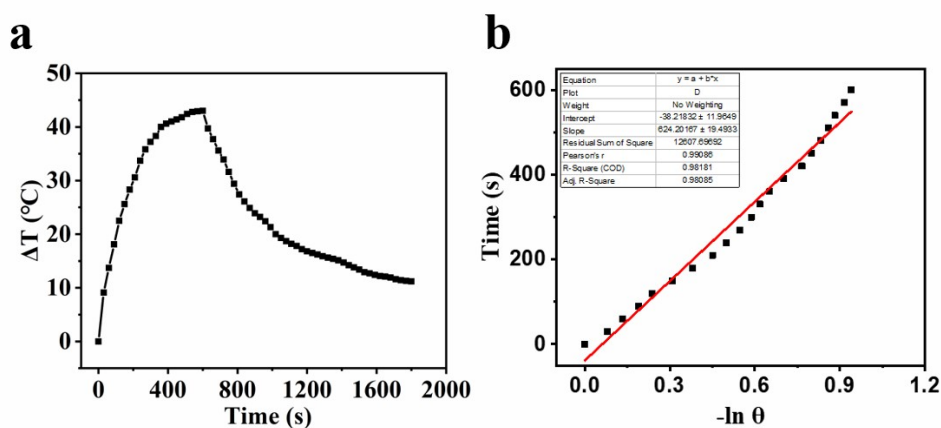

**Fig. S4.** (a) The temporal temperature variation of 5  $\mu\text{M}$   $[\text{Mo}_{154}]$  and 3 mM Cys after 48 h incubation (pH 5.0). The volume of solution is 1 mL, being irradiated for 10 min (808 nm, 1.4  $\text{W}/\text{cm}^2$ ); followed being cooled at ambient environment. (b) Time constant for heat transfer from the system is calculated to be  $\tau_s = 624.20212$  s by applying the linear time from the cooling period *versus* negative natural logarithm of driving force temperature, which is obtained from Fig. S4a.

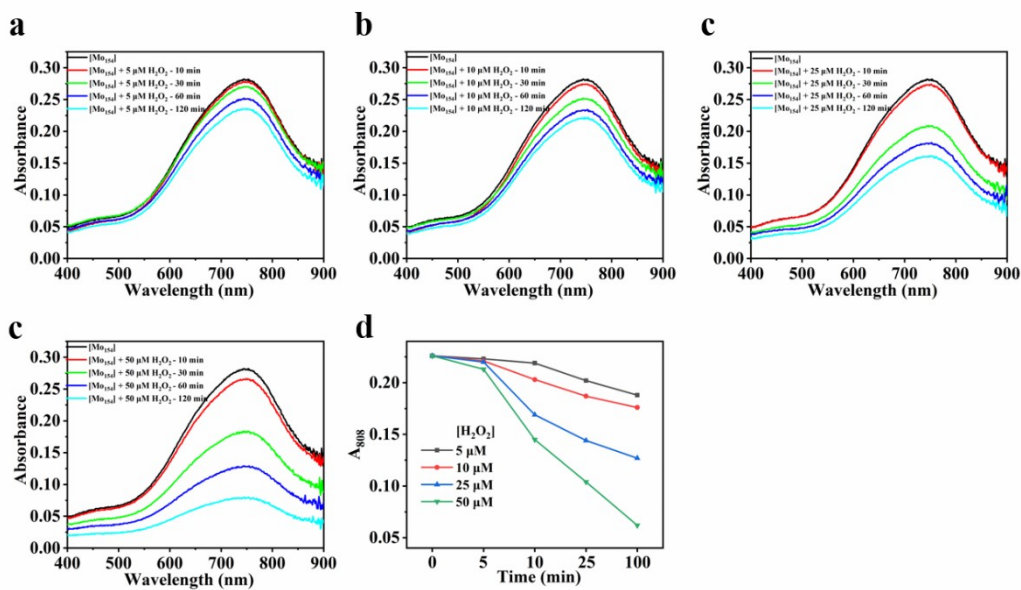

**Fig. S5.** UV-vis absorption spectra of 5 μM [Mo<sub>154</sub>] in the presence of the different amounts of H<sub>2</sub>O<sub>2</sub>, being measured at 120 min after mixing.

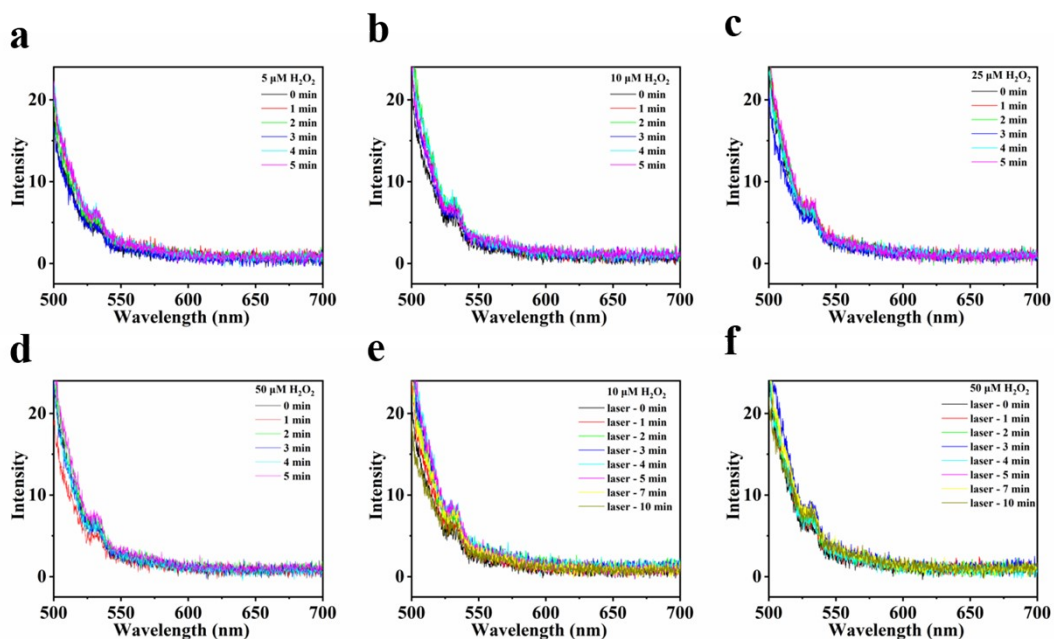

**Fig. S6.** The fluorescence spectra of 5 μM [Mo<sub>154</sub>] in solution after treated with H<sub>2</sub>O<sub>2</sub> and DCFH-DA, respectively, which shows no fluorescence intensity at 525 nm for DCF, no matter it was irradiated by 808 nm or not.
